# Supplementary material for: Hydrogen-bonded ring closing and opening of protonated methanol clusters H+(CH3OH)n (n = 4–8) with the inert gas tagging
Source: Royal Society of Chemistry journal article supplement (doi:10.1039/c5cp03379a), 2015-01-01
Supplement: c5cp03379a1.pdf [file c5cp03379a1.pdf]

## Electronic Supplementary Information

### Hydrogen-bonded ring closing and opening of protonated methanol clusters $\text{H}^+(\text{CH}_3\text{OH})_n$ ( $n = 4 - 8$ ) with the inert gas tagging

Ying-Cheng Li,<sup>1‡</sup> Toru Hamashima,<sup>2‡</sup> Ryoko Yamazaki,<sup>2</sup> Tomohiro Kobayashi,<sup>2</sup>

Yuta Suzuki,<sup>2</sup> Kenta Mizuse,<sup>2†</sup> Asuka Fujii,<sup>2\*</sup> Jer-Lai Kuo<sup>1\*</sup>

<sup>1</sup>Academia Sinica, <sup>2</sup>Tohoku University

‡ Ying-Chen Li and Toru Hamashima contributed equally to this study.

† Present address Tokyo Institute of Technology, Tokyo, 152-8551 Japan

\* To whom corresponding should be addressed.

E-mail: asukafujii@m.tohoku.ac.jp (A.F.), jlkuo@pub.iams.sinica.edu.tw (J.-L.K.).

#### Contents

- I. Confirmation of the accuracy of the relative energy evaluation by B3LYP/6-31+G(d).
- II. Number of stable isomers of  $\text{H}^+(\text{MeOH})_n$  optimized with B3LYP/6-31G(d).
- III. IR Spectra of  $\text{H}^+(\text{MeOH})_4$  with one and two Ar and  $\text{N}_2$  tags.
- IV. Temperature dependence of simulated Spectra of  $\text{H}^+(\text{MeOH})_n$  ( $n = 5 - 8$ ) and their comparison with bare and Ne/Ar-tagged spectra.
- V. Binding energies of Ar and Ne to  $\text{H}^+(\text{MeOH})_n$  ( $n = 3 - 5$ ).

### Supplementary Information (I)

Comparisons on the relative energetics between B3LYP/6-31+G(d) with  $\omega$ B97X-D/6-311++G(3df,3pd) for some selected isomers of  $\text{H}^+(\text{MeOH})_n$  ( $n = 5-7$ ). In each size and calculation level, the energy of the global minimum isomer is taken as zero.

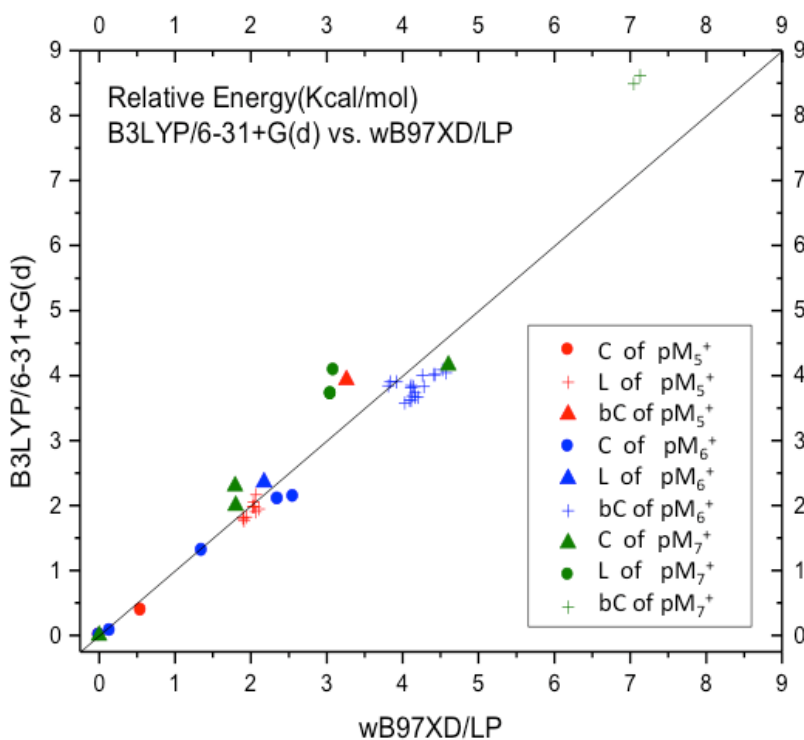

A clear linear correlation is seen between the relative energies by the two levels of theory. This plot indicates that the relative energy evaluation by B3LYP/6-31+G(d) has the reasonable accuracy in comparison with the dispersion-corrected calculation. More detailed confirmation for  $n = 7$  is seen in Ref. 7 of the main text.

**Supplementary Information (II)**

**Table SI: Number of stable isomers of  $\text{H}^+(\text{MeOH})_n$  ( $n = 4 - 8$ ) optimized with B3LYP/6-31+G(d).**

| B3LYP/6-31+G(d) | Linear (L) | Cyclic (C & Ct) | bi-Cyclic (bC) | all |
|-----------------|------------|-----------------|----------------|-----|
| n=4             | 1          | 1               | 0              | 2   |
| n=5             | 10         | 2               | 1              | 13  |
| n=6             | 16         | 5               | 1              | 22  |
| n=7             | 35         | 16              | 5              | 56  |
| n=8             | 47         | 38              | 8              | 93  |

Geometry of all these isomers is available upon request.

### Supplementary Information (III)

IR Spectra of  $\text{H}^+(\text{MeOH})_4$  with one and two Ar and  $\text{N}_2$  tags.

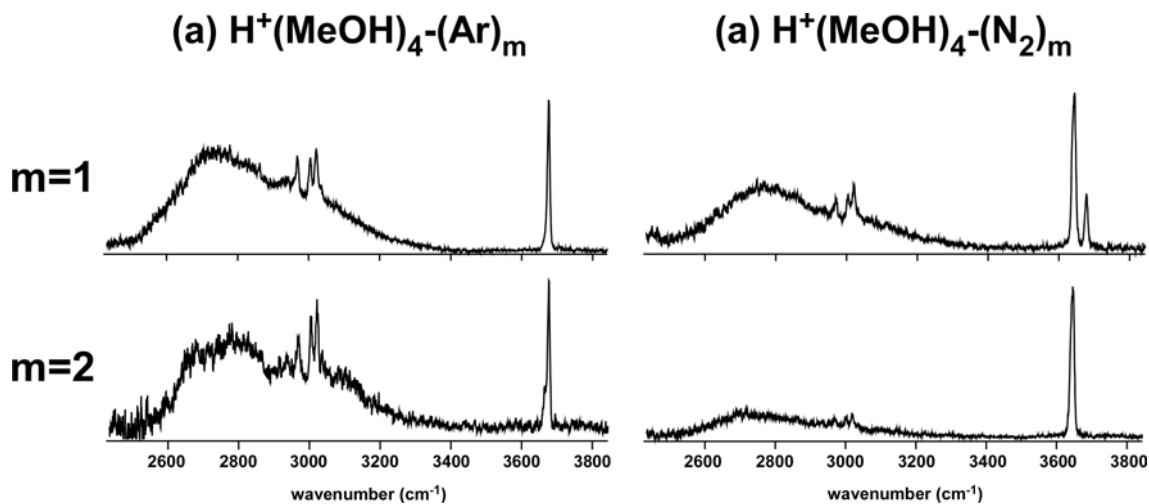

Two free OH stretch bands appear in  $\text{H}^+(\text{MeOH})_4-(\text{N}_2)_1$ , but only one free OH band is seen in  $\text{H}^+(\text{MeOH})_4-(\text{N}_2)_2$ . H-bond to the  $\text{N}_2$  tag causes the small shift of the “free” OH bond in the terminal methanol moiety. In  $\text{H}^+(\text{MeOH})_4-(\text{N}_2)_2$ , both the terminal OH bonds are H-bonded to the  $\text{N}_2$  tags, and the two “free” OH bands overlap with each other. The spectra of  $\text{H}^+(\text{MeOH})_4-(\text{Ar})_m$ , in which the perturbation by the tag is much less, are shown for comparison.

### Supplementary Information (IV)

Temperature dependence of simulated spectra of  $\text{H}^+(\text{MeOH})_n$  ( $n = 5 - 8$ ) and their comparison with bare and Ne/Ar-tagged spectra. All the simulations were performed at B3LYP/6-31+G(d).

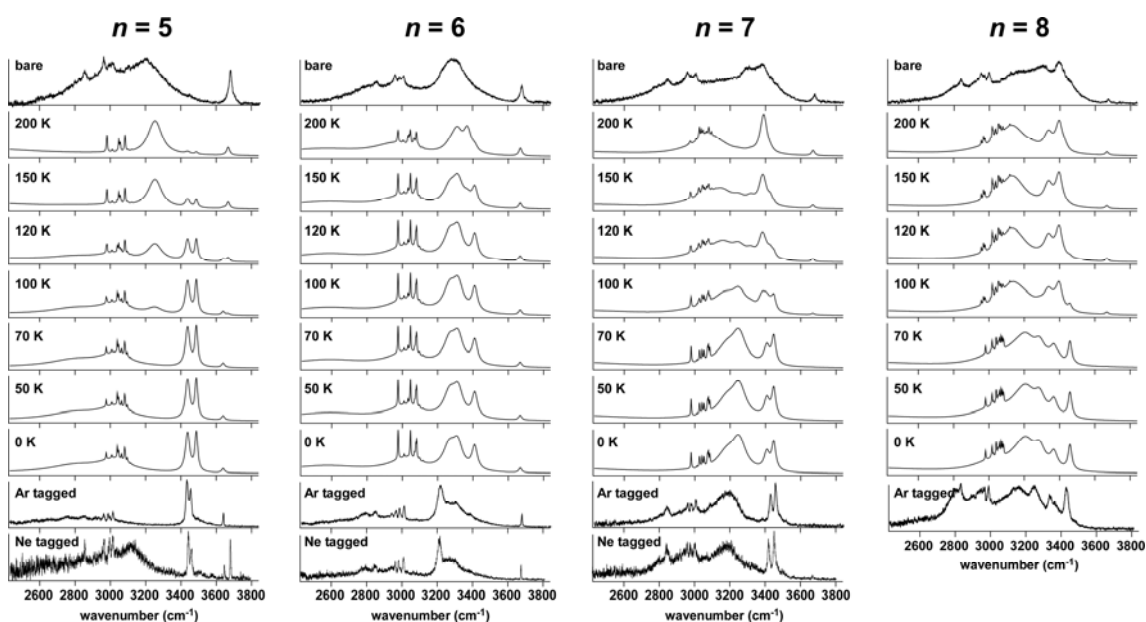

We can see that the experimentally observed spectra of the bare species are comparable with the simulated spectra at 150 ~ 200 K. The Ne/Ar-tagged spectra compare well with the simulated spectra at 0 ~ 70 K.

### Supplementary Information (V)

Binding energies ( $D_e$  in kcal/mol) of Ar and Ne to  $H^+(MeOH)_n$  ( $n = 3 - 5$ ) at  $\omega B97X-D/6-311++G(3df,3pd)$ . Maximum vibrational temperature ( $T_{max}$ ) is also shown.

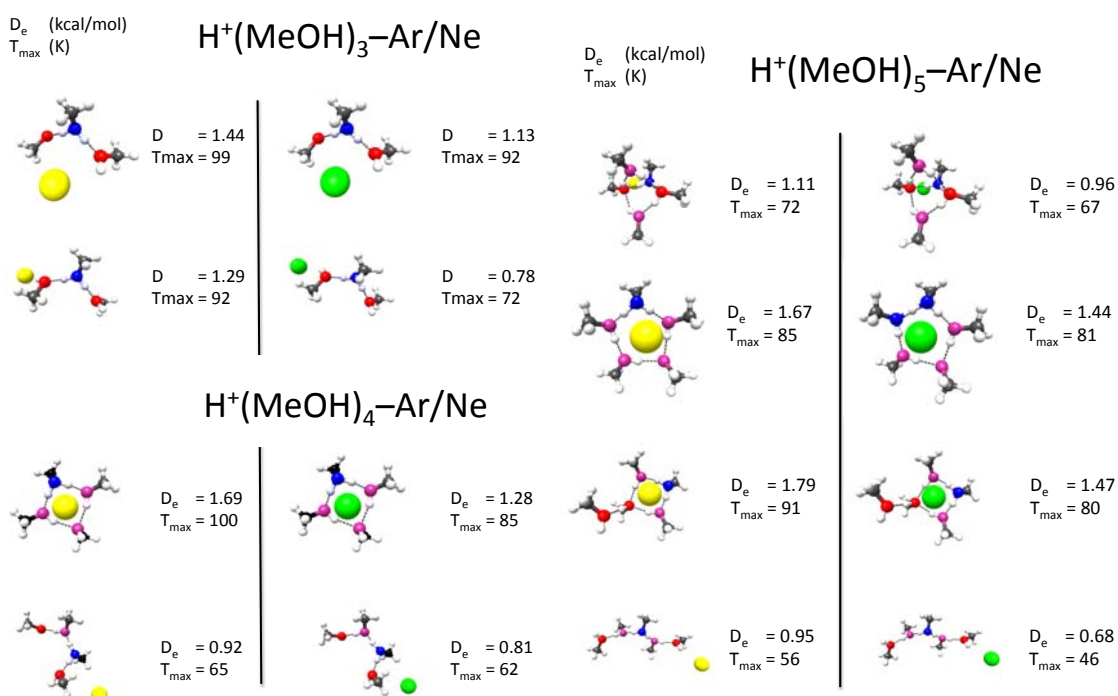

Binding energies of Ar and Ne to  $H^+(MeOH)_n$  ( $n = 3 - 5$ ) are shown above. Ar atoms are shown in yellow and Ne atoms in green. We should note here that binding of Ar and Ne to  $H^+(MeOH)_7$  can be found in Figure 5 in one of our previous works (Ref. 7 of the main text)
